# Supplementary material for: Removal of 4-Ethylphenol and 4-Ethylguaiacol, from Wine-like Model Solutions, by Commercial Modified Activated Carbons Produced from Coconut Shell
Source: MDPI journal article supplement (doi:10.3390/app122211754), 2022-11-18
Supplement: s1 [file s1]

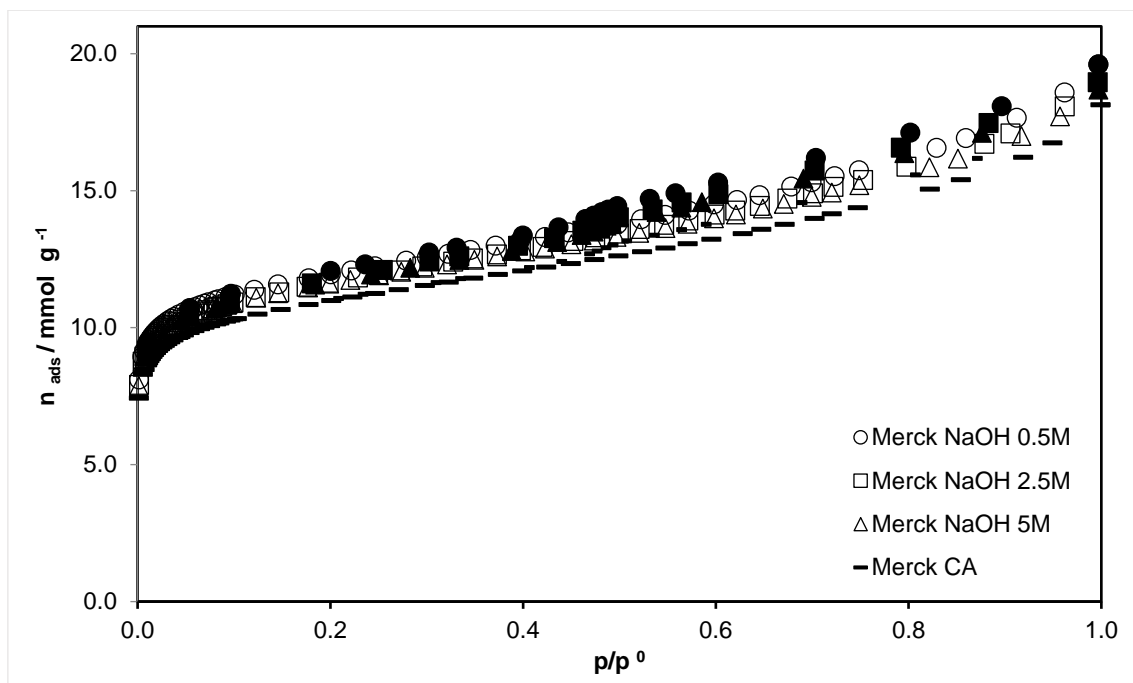

Figure S1. Nitrogen adsorption isotherms obtained, at 77 K, on the commercial AC, from Merck, submitted to basic treatments with NaOH

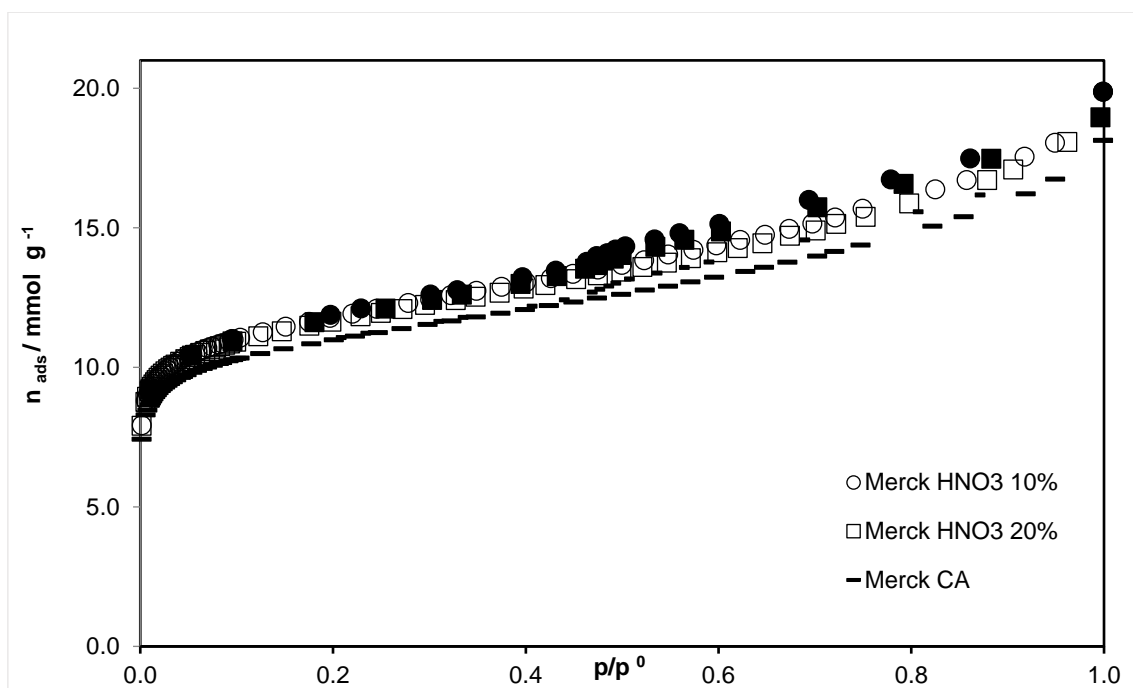

Figure S2. Nitrogen adsorption obtained, at 77 K, on the commercial AC, from Merck, submitted to treatments with HNO<sub>3</sub>

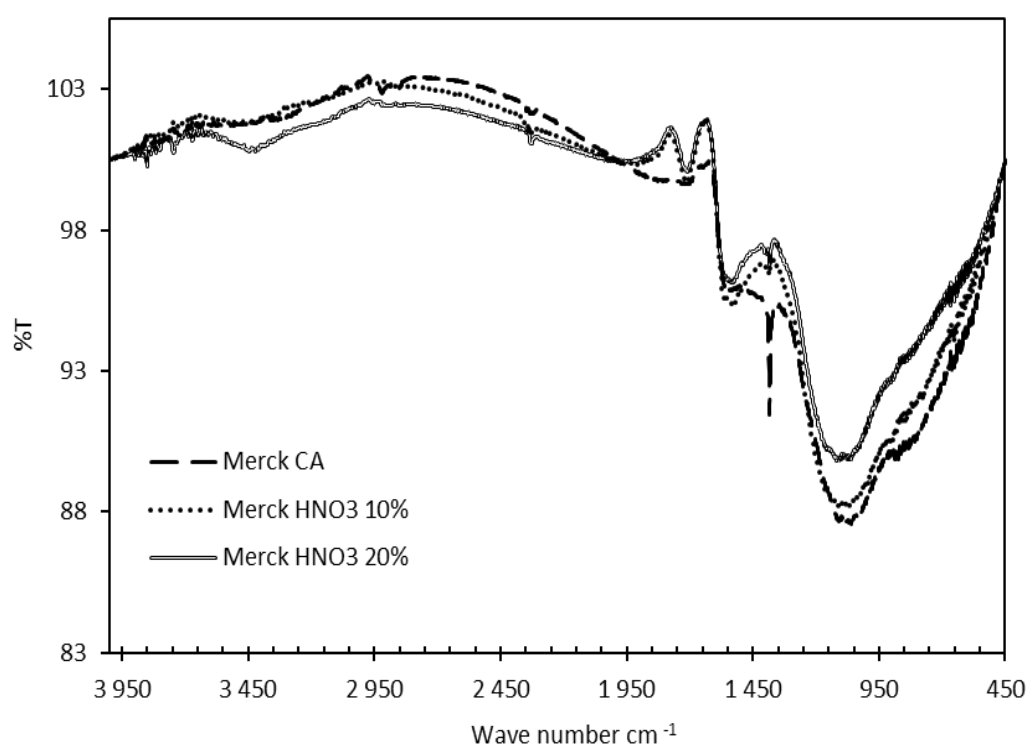

Figure S3. FTIR spectra of AC from Merck, as received and after submitted to acid treatments with HNO<sub>3</sub>.

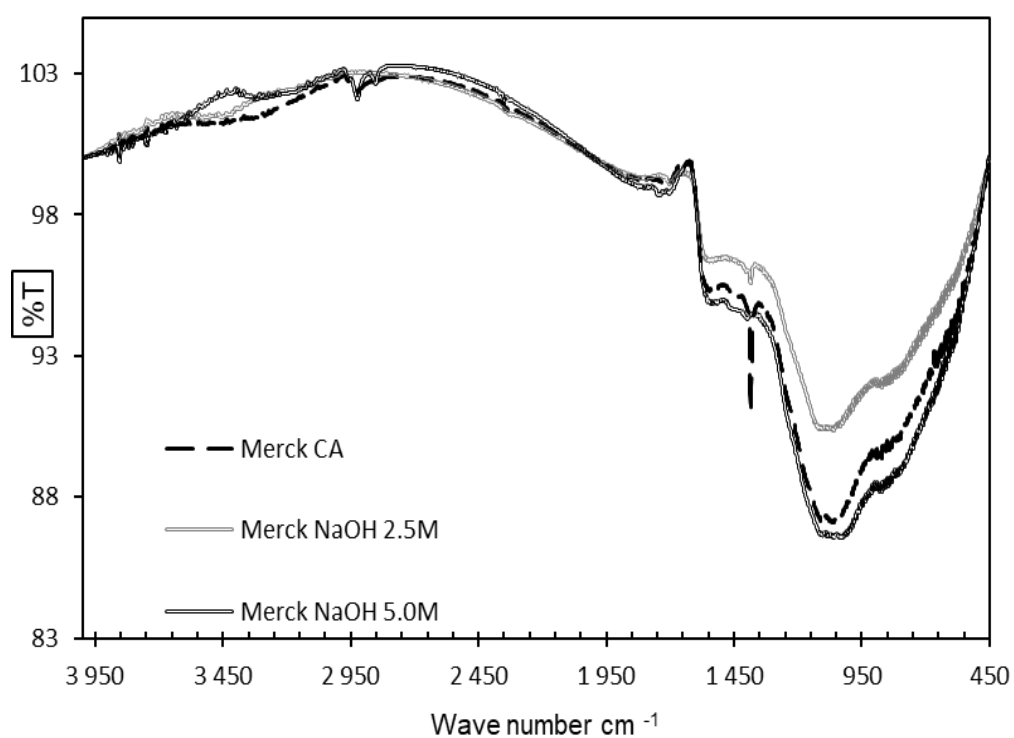

Figure S4. FTIR spectra of AC from Merck, as received and after submitted to basic treatments with NaOH.

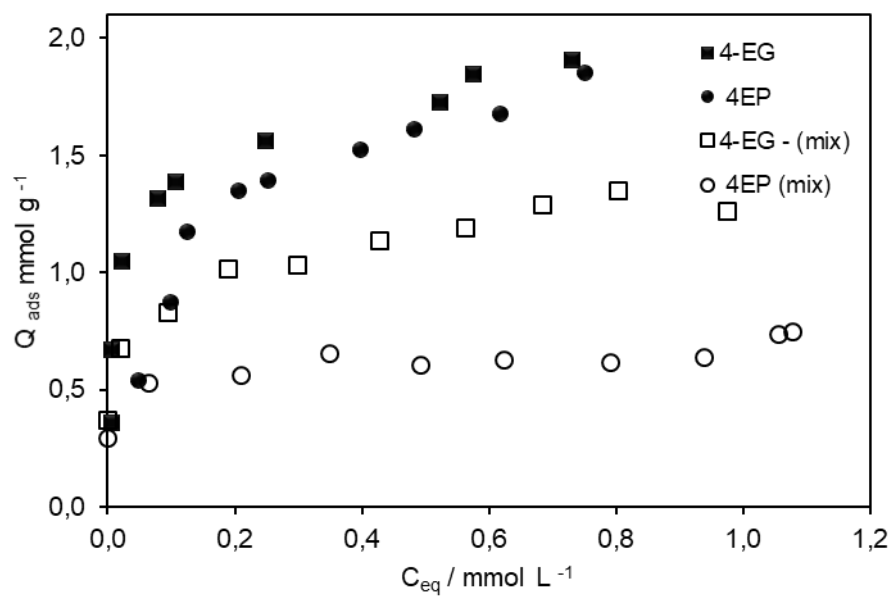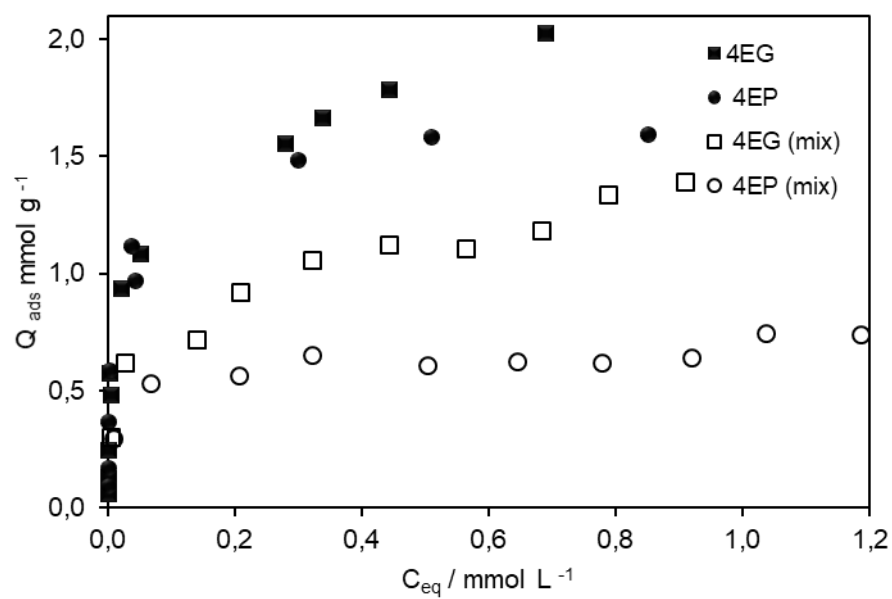

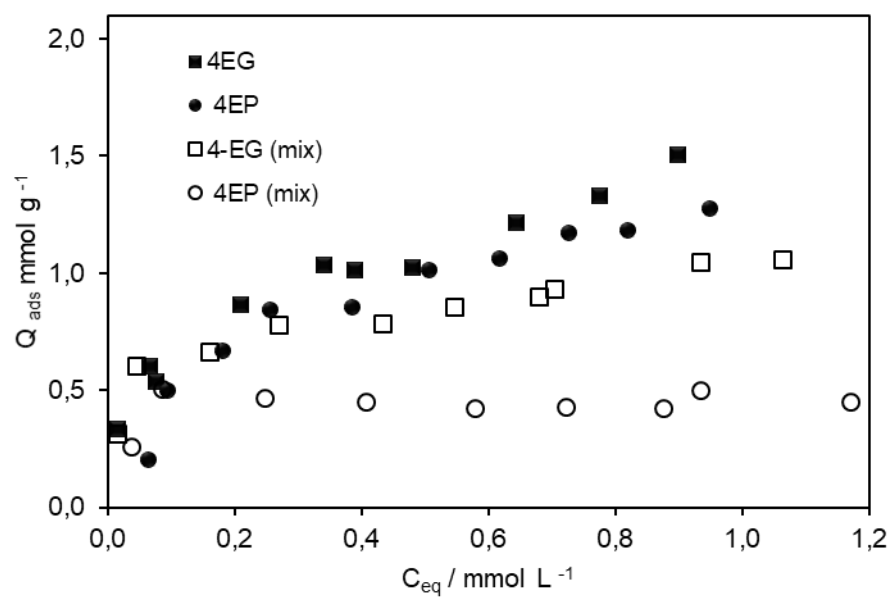

Figure S5. Adsorption isotherms of 4-EP and 4-EG, obtained from solutions where the phenolic compounds were isolated or present in a mixture, a) Panreac; b) Merck; c) Merck-HNO<sub>3</sub>-10.
