# Supplementary material for: Removal of 4-Ethylphenol and 4-Ethylguaiacol, from Wine-like Model Solutions, by Commercial Modified Activated Carbons Produced from Coconut Shell
Source: MDPI journal article supplement (doi:10.3390/app122211754), 2022-11-18
Supplement: s1 [file s1]

Archive with 1 entries (1 files):
- applsci-2021121-supplementary.pdf
